# Supplementary material for: Dual oxidase/oxygenase reactivity and resonance Raman spectra of {Cu3O2} moiety with perfluoro-t-butoxide ligands
Source: Royal Society of Chemistry journal article supplement (doi:10.1039/c9dt00516a), 2019-01-01
Supplement: c9dt00516a1.pdf [file c9dt00516a1.pdf]

## Dual Oxidase/ Oxygenase Reactivity and Resonance Raman Spectrum of {Cu<sub>3</sub>O<sub>2</sub>} Moiety with Perfluoro-t-butoxide Ligands

Sarah E.N. Brazeau, Emily E. Norwine, Steven F. Hannigan, Nicole Orth, Ivana Ivanović-Burmazović, Dieter Rukser, Florian Biebl, Benjamin Grimm-Lebsanft, Gregor Praedel, Melissa Teubner, Michael Rübhausen, Patricia Liebhäuser, Thomas Rösener, Julia Stanek, Alexander Hoffmann, Sonja Herres-Pawlis, and Linda H. Doerr

### Supporting Information

| Item       | Title                                                                                                                                                                   | Page  |
|------------|-------------------------------------------------------------------------------------------------------------------------------------------------------------------------|-------|
| Figure S1  | Resonance Raman of T <sub>OC4F9</sub> at different wavelengths                                                                                                          | 2     |
| Figure S2  | DFT-optimized singlet for T <sub>OC4F9</sub> .                                                                                                                          | 3     |
| Figure S3  | UV-vis spectra of fully-formed T <sub>OC4F9</sub> at different concentrations after 375 s.                                                                              | 3     |
| Figure S4a | Absorbance at $\lambda = 520$ nm vs. time for seven different Cu concentrations for 75 s.                                                                               | 4     |
| Figure S4b | Experimental vs. fit of absorbance $\lambda = 520$ nm vs. time for [Cu]= 4.95 mM at 75 s.                                                                               | 4     |
|            | Method for analysis of absorbance vs. time data                                                                                                                         | 5     |
| Figure S5  | Absorbance vs. time data for 4.95 mM at 7.5 s before and after dip removal.                                                                                             | 5     |
| Figure S6  | Absorbance at $\lambda = 520$ nm of {Cu <sub>3</sub> O <sub>2</sub> } <sup>3-</sup> from 5 mM initial Cu(I) at -78 °C in THF over 219 minutes.                          | 6     |
| Figure S7a | Representative <sup>1</sup> H NMR spectrum showing catalytic H <sub>2</sub> Q to BQ conversion in d <sup>6</sup> -acetone, inset on aromatic region.                    | 7     |
| Figure S7b | Representative <sup>1</sup> H NMR spectrum showing catalytic H <sub>2</sub> Q to BQ conversion in d <sup>6</sup> -acetone, full spectrum.                               | 8     |
| Figure S8a | Representative <sup>1</sup> H NMR spectrum of run #10 showing catechol Product A formation, inset.                                                                      | 9     |
| Figure S8b | Representative <sup>1</sup> H NMR spectrum of run #10 showing catechol Product B formation, full spectrum.                                                              | 10    |
| Figure S8c | Representative <sup>1</sup> H NMR spectrum of run #16 showing catechol Product B formation.                                                                             | 11    |
| Figure S9  | Identification of unlabeled ( <sup>16</sup> O) catechol by DART+ MS.                                                                                                    | 12    |
| Figure S10 | Identification of isotopically labeled ( <sup>18</sup> O) catechol by <sup>1</sup> H NMR.                                                                               | 13    |
| Figure S11 | Identification of isotopically labeled ( <sup>18</sup> O) catechol by DART+ MS.                                                                                         | 13    |
| Table S1   | Summary of <i>k<sub>f</sub></i> values for two-step model (A → B → C).                                                                                                  | 14-15 |
| Table S2   | Summary of <i>k<sub>f</sub></i> values for 4.95 mM at 520 nm, for one step model (A → B).                                                                               | 15    |
| Table S3   | Summary of <i>k<sub>f</sub></i> values for two concentrations for two-step model (A → B → C) and the standard deviation for the residuals $\sigma_r$ (global analysis). | 16    |
| Table S4   | Summary of <i>k<sub>f</sub></i> values for two concentrations for global analysis and the standard deviation for the residuals $\sigma_r$ , for one step model (A → B). | 16    |
| Table S5   | Catalytic H <sub>2</sub> Q oxidation to BQ by T <sub>OC4F9</sub> in THF at -78°C.                                                                                       | 17    |
| Table S6   | Product quantification in hydroxylation of phenolate (DBP) to catechol (DBC) by T <sub>OC4F9</sub> in THF at -78°C                                                      | 18    |

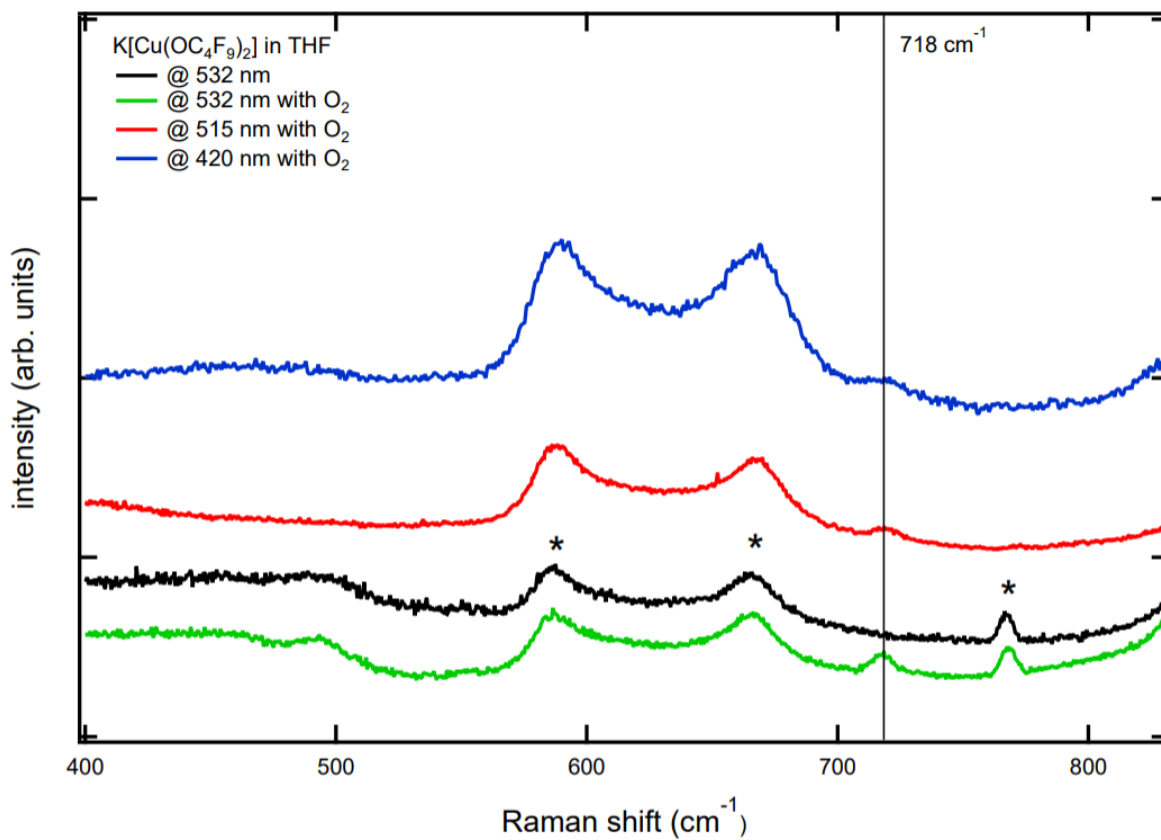

**Figure S1.** Resonance Raman of T<sub>OC<sub>4</sub>F<sub>9</sub></sub> at different wavelengths.

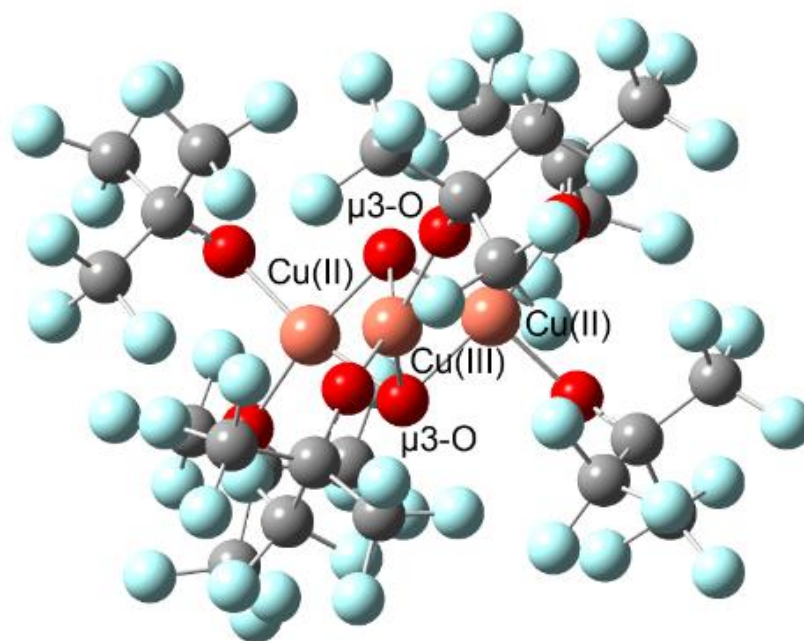

**Figure S2.** DFT-optimized  $S = 0$  for  $\text{SyToc4F9}$ .

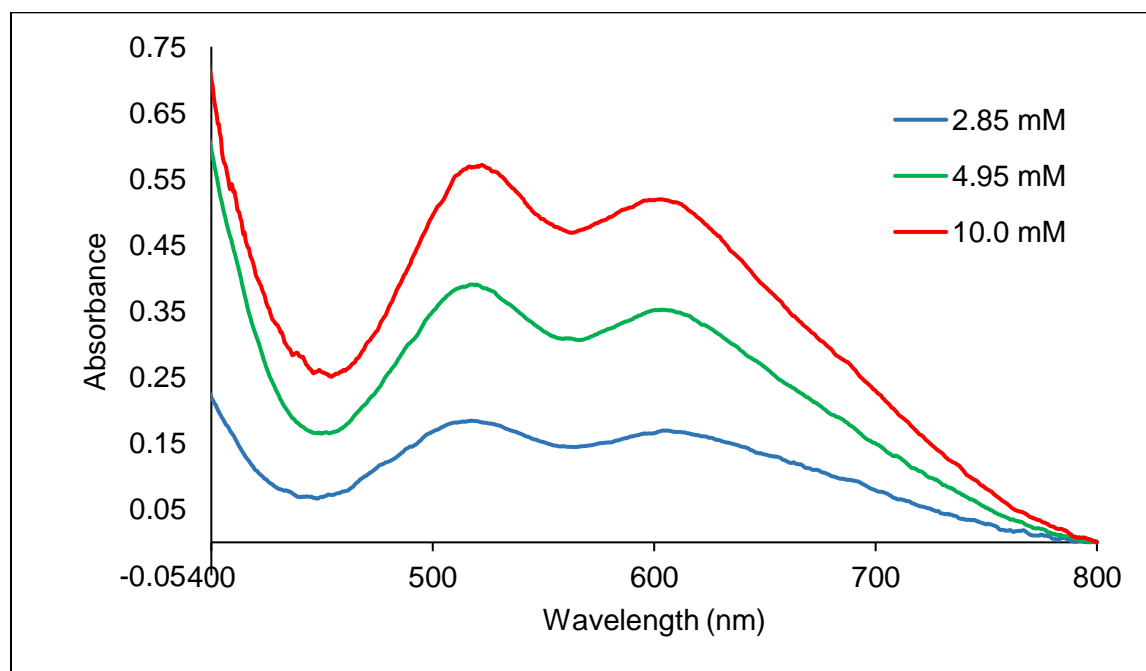

**Figure S3.** UV-vis spectra of fully-formed  $T_{OC4F9}$  at different concentrations after 375 s.

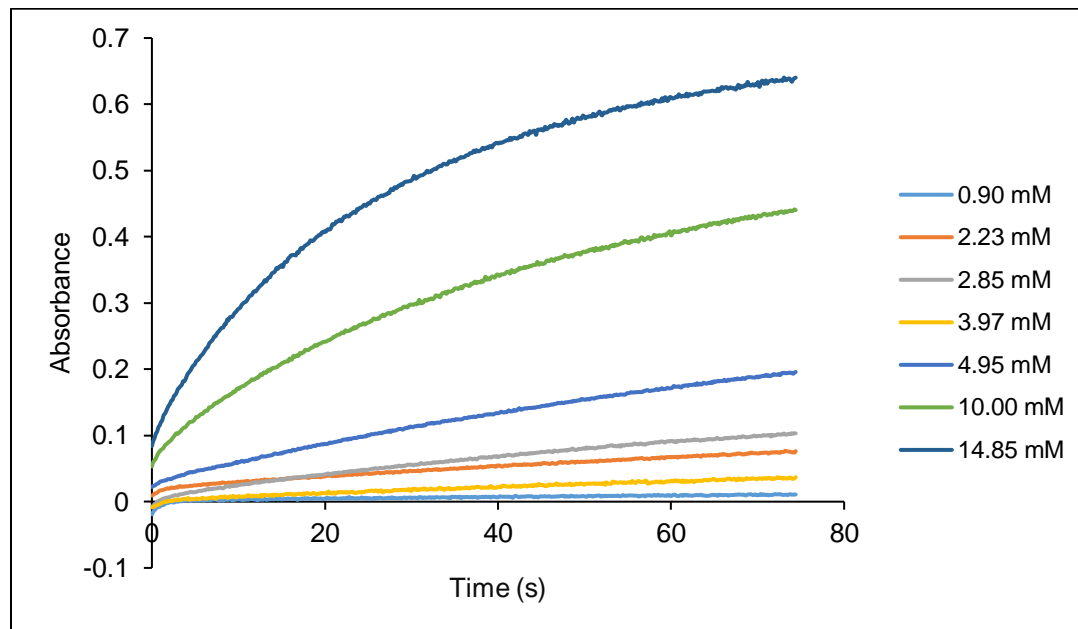

**Figure S4a.** Absorbance at  $\lambda = 520$  nm vs. time for seven different Cu concentrations for 75 s.

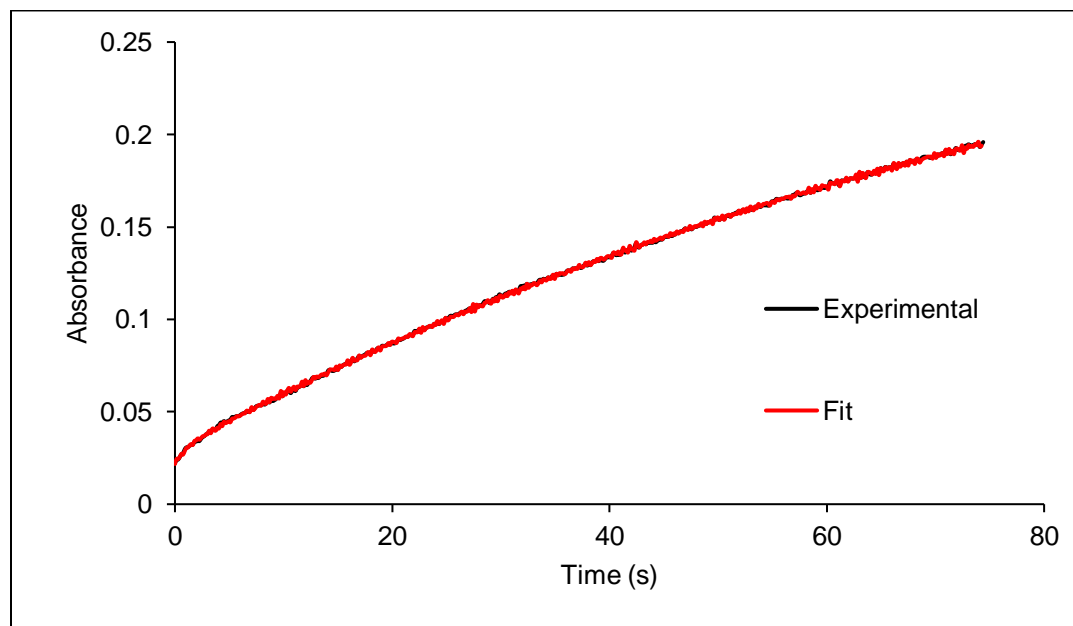

**Figure S4b.** Experimental vs. fit of absorbance  $\lambda = 520$  nm vs. time for  $[Cu] = 4.95$  mM at 75 s.

**Method for analysis of absorbance vs. time data:** All stopped flow experiments were performed using a HI-TECH Scientific SF-61SX2 device with a diode array and photomultiplier detector, with the TgK Scientific Program Kinetic Studio 4.0.8.18533. Analysis revealed the presence of only two visible peaks, 520 nm and 602 nm, that slowly grow in as  $T_{OC4F9}$  forms. Absorbance vs. time data were extracted from these files at 520 nm only, as kinetic behavior at both wavelengths was the same. When data from the shortest time stamps were plotted, a dip appears that results from the change in pressure as the solutions from the syringes are mixed. This dip interfered with the determination of steps and formation constants in the formation of  $T_{OC4F9}$ . The dip was removed by first eliminating only the x-values associated with this phenomenon, and then all x-values were subtracted from the first remaining x-value to shift the values to start at zero. The results of this procedure are shown in Figures S4 and S5. For larger time stamps (greater than 150 s), this modification was not necessary, as the dip was minimal. The resulting data were then imported into JPlus Consulting program ReactLab KINETICS (Build 10, Version 1.1). At all published concentrations, two steps were identified ( $A \rightarrow B \rightarrow C$ ), believed to be first the formation of  $O_{OC4F9}$ , followed by the formation of  $T_{OC4F9}$ . Formation constants were determined for each process, with the results averaged together and presented in Tables 2 and 3 in this publication, with further details in Table S1 and Table S3. A one-step fit was also attempted (Table S2 and Table S4), but was unable to be fit.

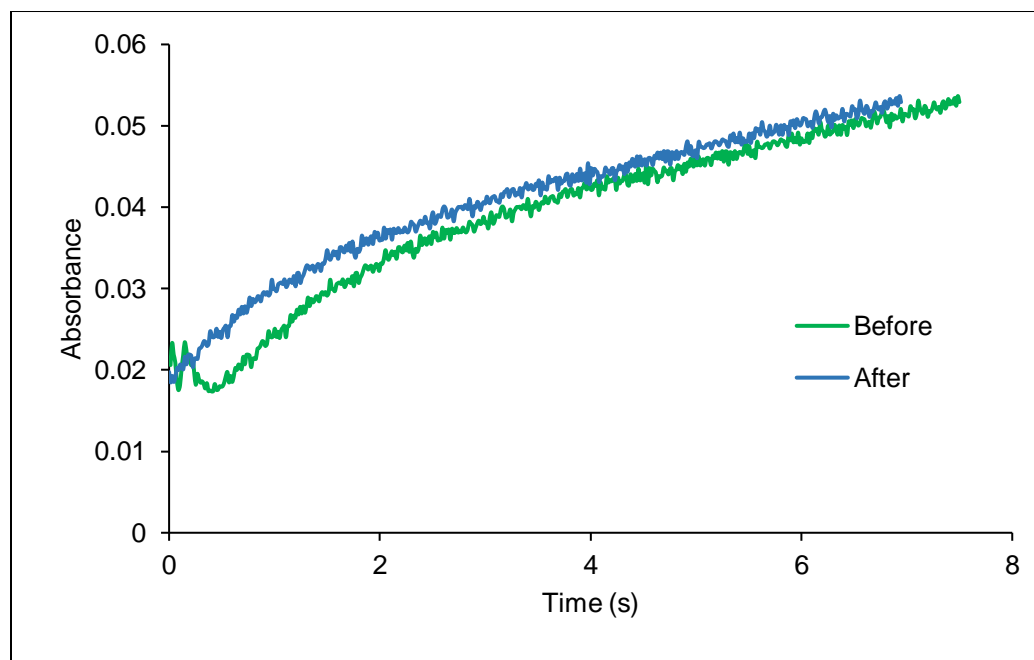

**Figure S5.** Absorbance at  $\lambda = 520$  nm vs. time for  $[Cu] = 4.95$  mM at 7.5 s before and after dip removal.

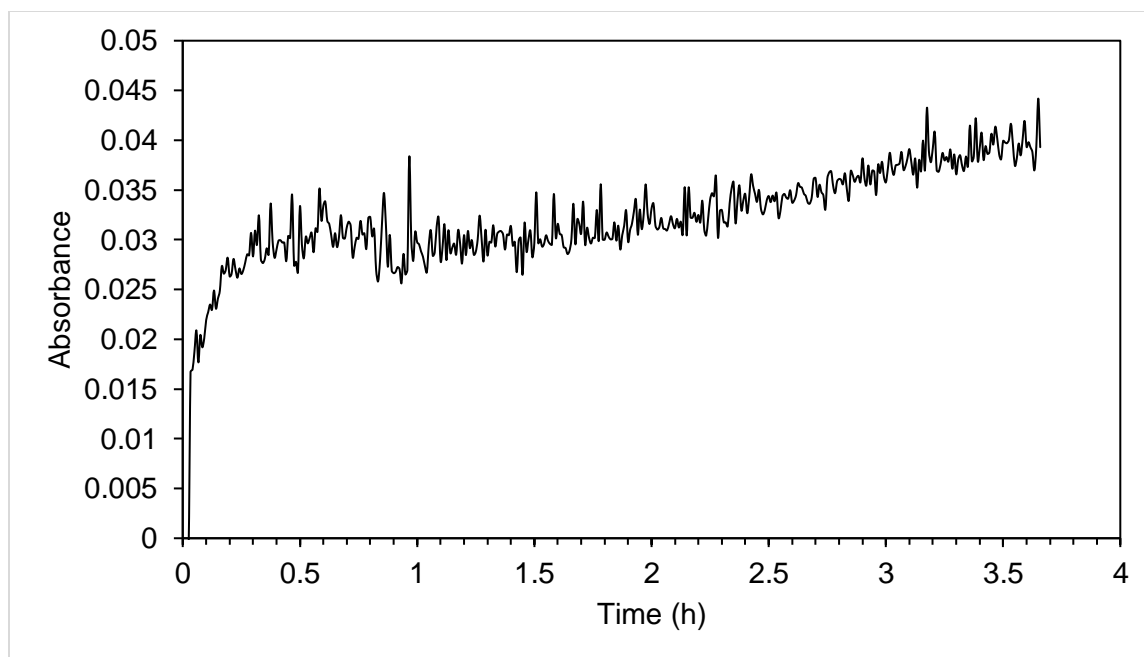

**Figure S6.** Absorbance at  $\lambda = 520$  nm of  $\{\text{Cu}_3\text{O}_2\}^{3-}$  from 5 mM initial Cu(I) at  $-78$  °C in THF over 219 minutes.

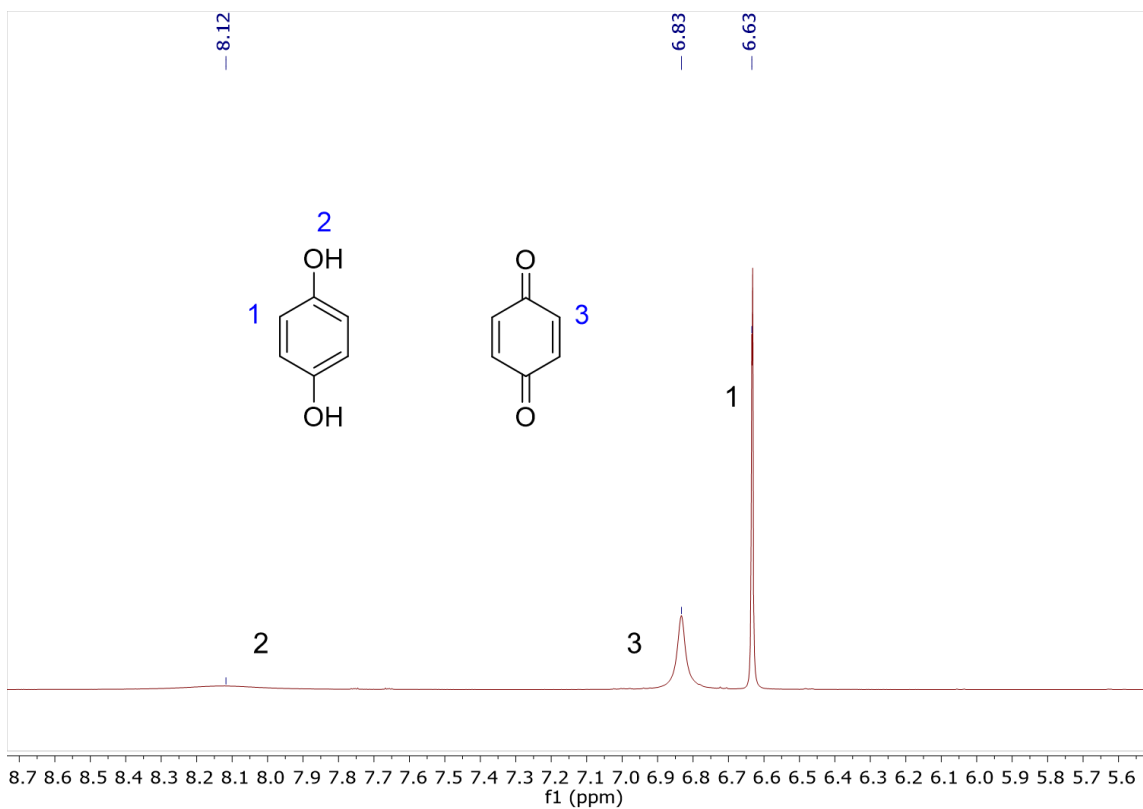

**Figure S7a.**  $^1\text{H}$  NMR spectrum from the 5th run in Table S1 showing catalytic H<sub>2</sub>Q to BQ conversion in  $d^6$ -acetone, inset of full spectrum into aromatic region.  $^1\text{H}$  NMR taken after reaction was warmed to room temperature and concentrated, with DMSO added as an internal standard. A relaxation delay of 5 seconds was used.

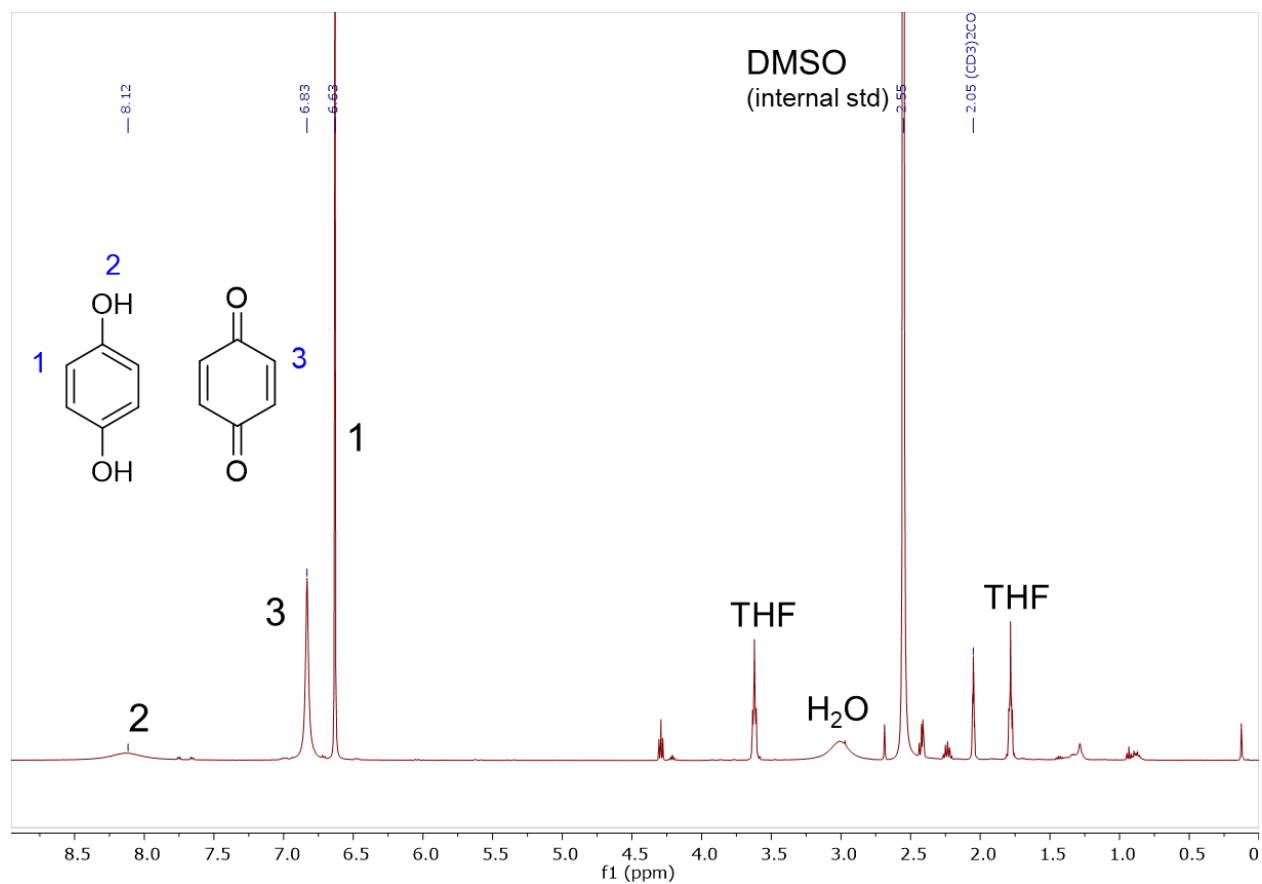

**Figure S7b.** Representative full  $^1\text{H}$  NMR spectrum showing catalytic  $\text{H}_2\text{Q}$  to BQ conversion in  $d^6$ -acetone.  $^1\text{H}$  NMR taken after reaction was warmed to room temperature and concentrated, with DMSO added as an internal standard. A relaxation delay of 5 seconds was used.



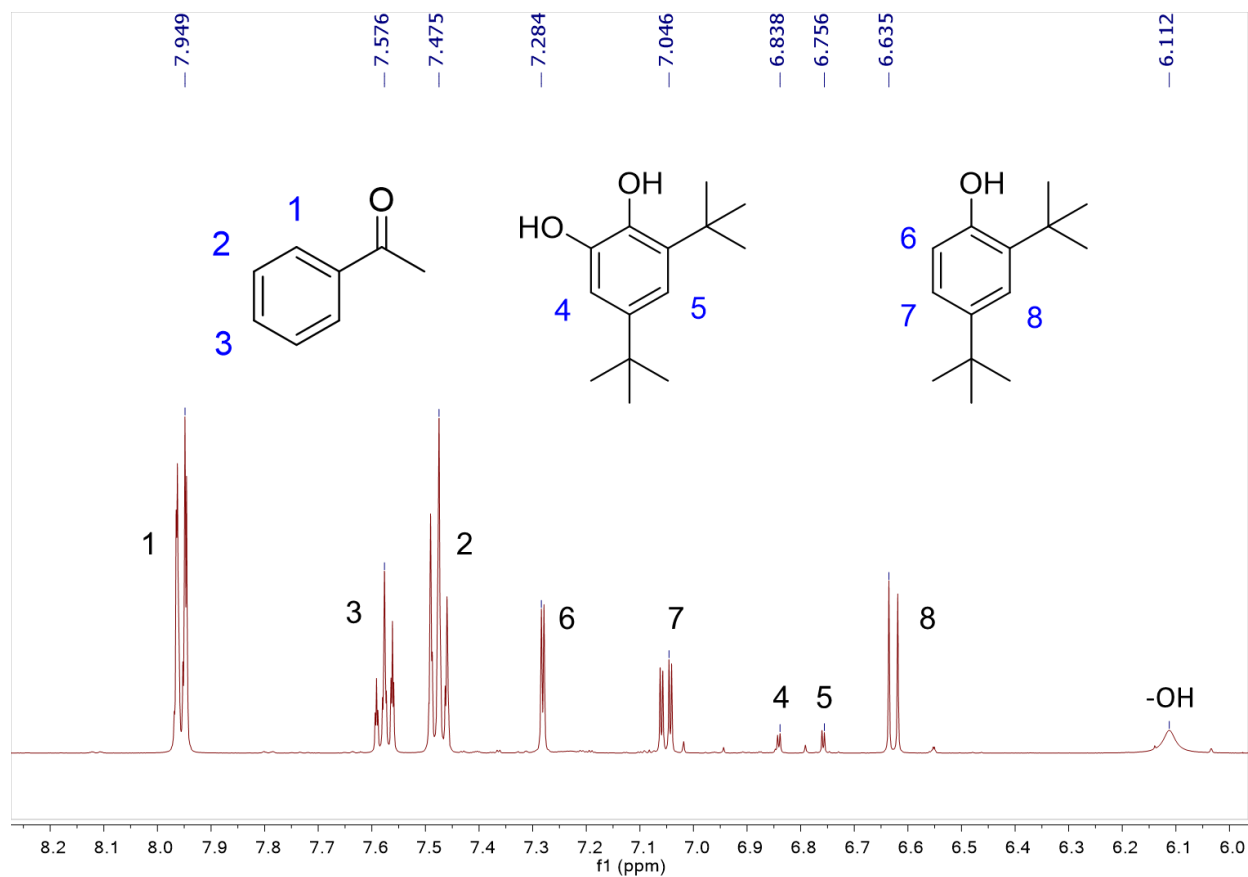

**Figure S8a.** Representative  $^1\text{H}$  NMR spectrum of run #10 showing catechol product A formation in  $\text{CD}_2\text{Cl}_2$ , zoom in on aromatic region.  $^1\text{H}$  NMR taken after reaction was warmed to room temperature, quenched and extracted into organic solvent, with acetophenone added as an internal standard. A relaxation delay of 5 seconds was used.

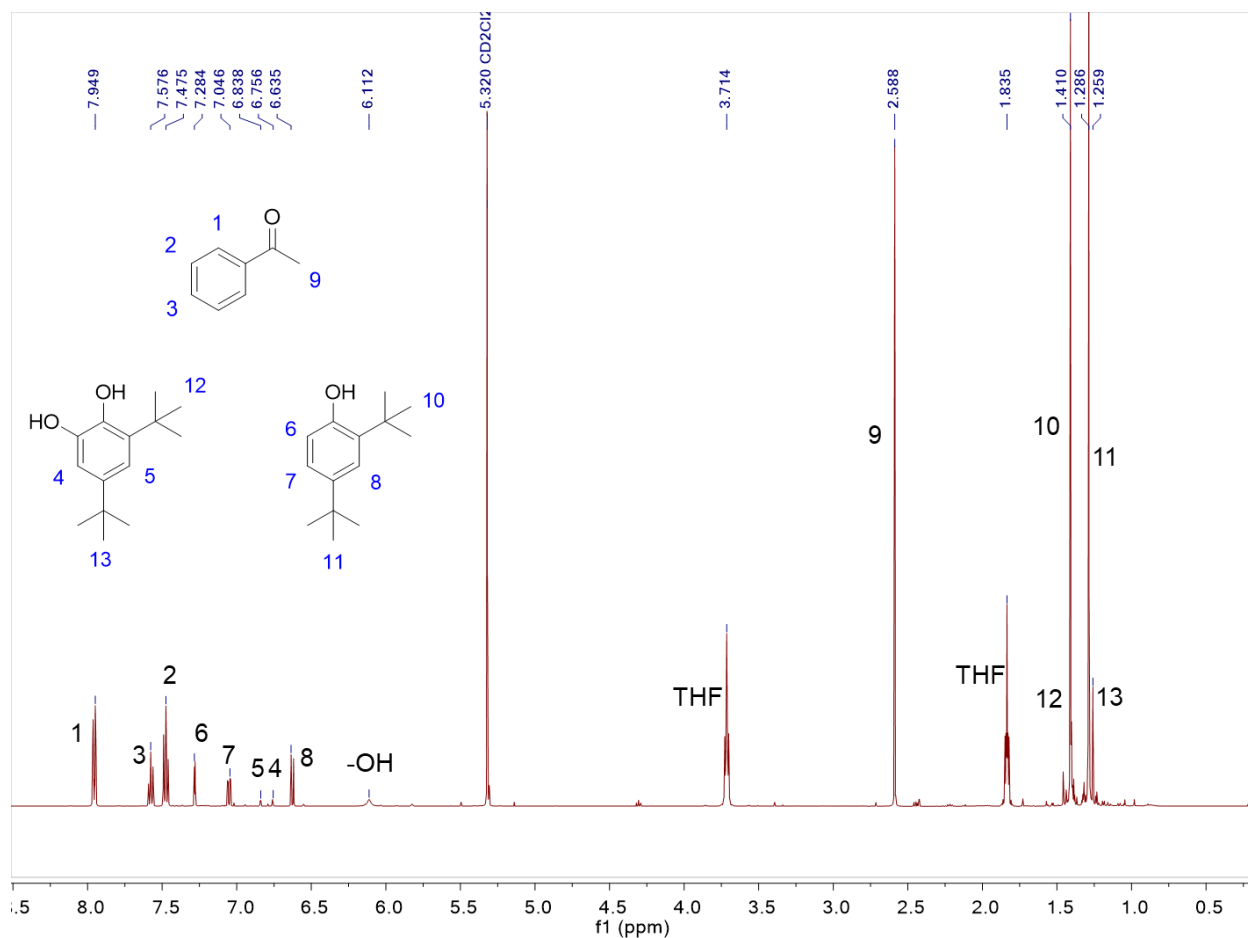

**Figure S8b.** Representative <sup>1</sup>H NMR spectrum of run #10 showing catechol product A formation in CD<sub>2</sub>Cl<sub>2</sub>, full spectrum of v1. <sup>1</sup>H NMR taken after reaction was warmed to room temperature, quenched and extracted into organic solvent, with acetophenone added as an internal standard. A relaxation delay of 5 seconds was used.

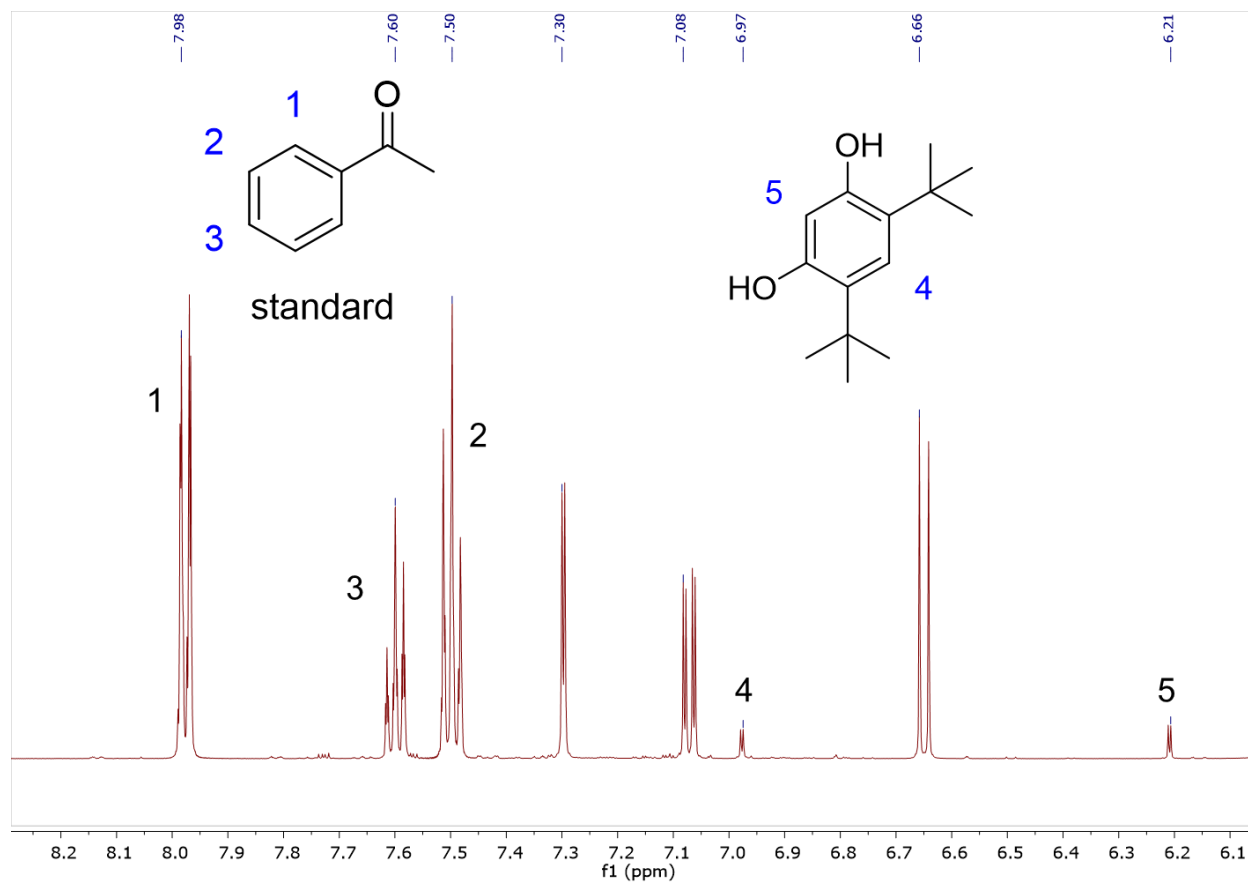

**Figure S8c.** Representative  $^1\text{H}$  NMR spectrum of run #16 showing catechol product B formation in  $\text{CD}_2\text{Cl}_2$ .  $^1\text{H}$  NMR taken after reaction was warmed to room temperature, quenched and extracted into organic solvent, with acetophenone added as an internal standard. A relaxation delay of 5 seconds was used.

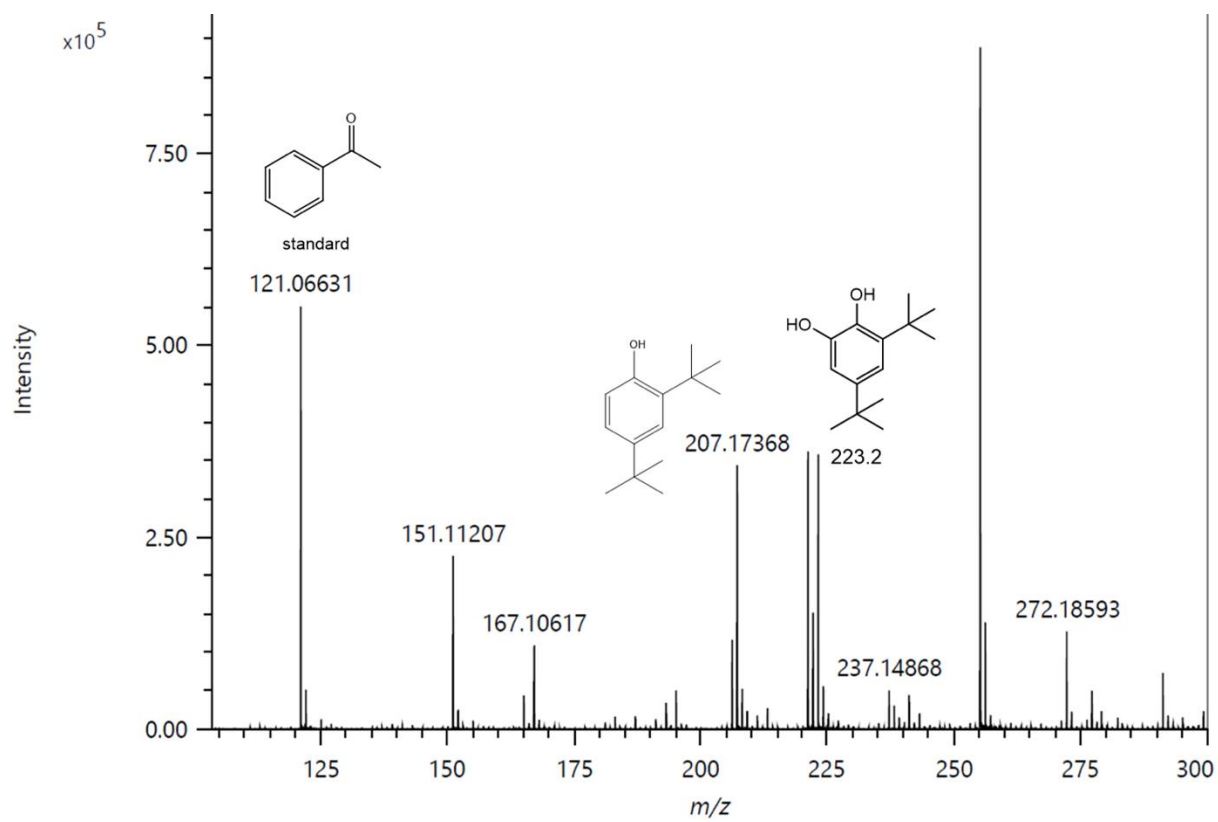

**Figure S9.** Identification of unlabeled (<sup>16</sup>O) catechol by DART+ MS.

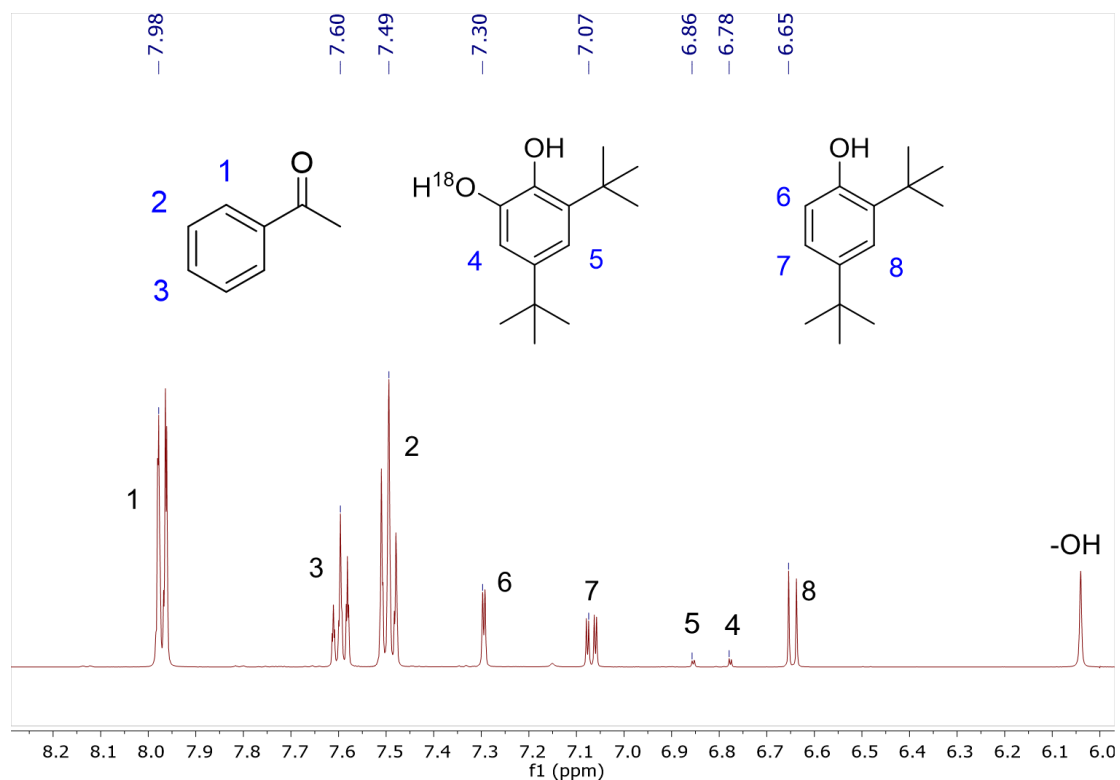

**Figure S10.** Identification of isotopically labeled ( $^{18}\text{O}$ ) catechol by  $^1\text{H}$  NMR.  $^1\text{H}$  NMR taken after reaction was warmed to room temperature, quenched and extracted into organic solvent, with acetophenone added as an internal standard. A relaxation delay of 5 seconds was used.

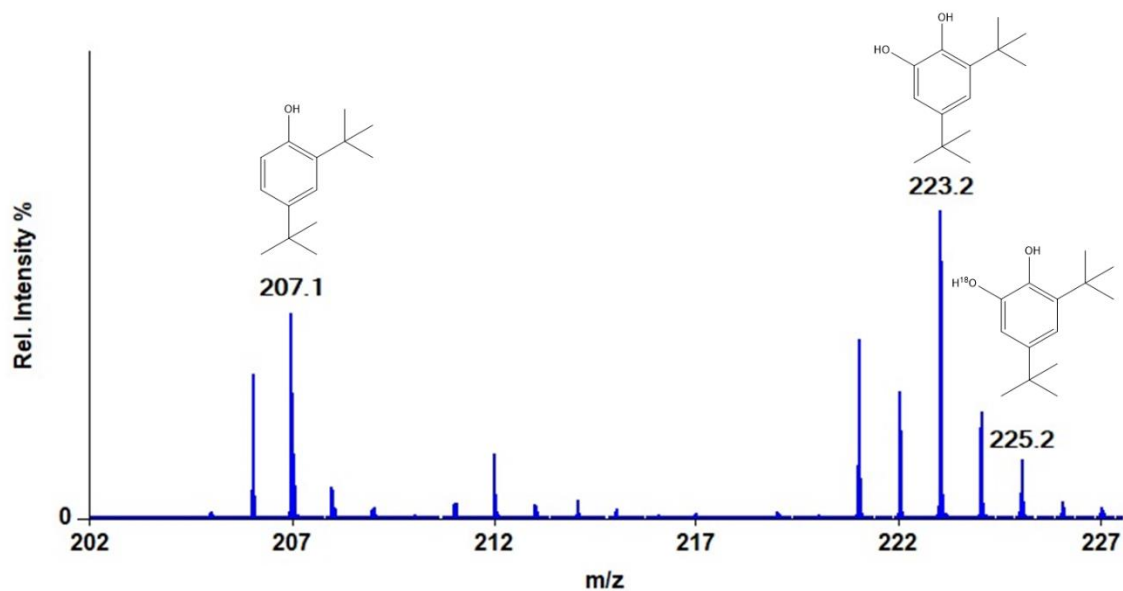

**Figure S11.** Identification of isotopically labeled ( $^{18}\text{O}$ ) catechol by DART+ MS.

**Table S1.** Summary of  $k_f$  values for two-step model ( $A \rightarrow B \rightarrow C$ ). For each Cu(I) concentration, several timestamps were evaluated by stopped flow. The absorbance vs. time data at 520 nm was then imported into ReactLab KINETICS, in which the data evaluated under pseudo first-order kinetics. This was found to fit to a two-step model, confirmed by a low residual. Greater detail can be found previously, in “Method for analysis of absorbance vs. time data.”

| [Cu(I)] (mM) | Time (s) | $k_{1-F}$ (s <sup>-1</sup> ) | $k_{2-F}$ (s <sup>-1</sup> ) | Residual |
|--------------|----------|------------------------------|------------------------------|----------|
| <b>0.9</b>   | 7.5      | 1.16 ± 0.082                 | 0.23 ± 0.10                  | 0.0012   |
|              | 15       | 1.08 ± 0.041                 | 0.11 ± 0.030                 | 0.0010   |
|              | 75       | 0.84 ± 0.031                 | 0.0097 ± 0.0011              | 0.0012   |
|              | 150      | 0.87 ± 0.039                 | 0.0041 ± 0.00031             | 0.0010   |
|              | 750      | 0.45 ± 0.067                 | 0.0031 ± 0.000035            | 0.0010   |
|              | Average  | 0.88 ± 0.052                 | 0.071 ± 0.027                | 0.0011   |
| <b>2.23</b>  | 7.5      | 1.02 ± 0.046                 | 0.0046 ± 0.031               | 0.0011   |
|              | 15       | 1.16 ± 0.078                 | 0.072 ± 0.0085               | 0.0010   |
|              | 37.5     | 0.99 ± 0.053                 | 0.012 ± 0.0014               | 0.0013   |
|              | 75       | 0.75 ± 0.045                 | 0.0068 ± 0.00020             | 0.0012   |
|              | 150      | 0.87 ± 0.082                 | 0.0059 ± 0.000080            | 0.0018   |
|              | 375      | 0.027 ± 0.0024               | 0.0041 ± 0.000075            | 0.0025   |
|              | Average  | 0.80 ± 0.051                 | 0.018 ± 0.0070               | 0.0015   |
| <b>2.85</b>  | 7.5      | 1.07 ± 0.10                  | 0.010 ± 0.042                | 0.0020   |
|              | 15       | 0.99 ± 0.046                 | 0.018 ± 0.0041               | 0.0010   |
|              | 75       | 0.67 ± 0.039                 | 0.012 ± 0.00014              | 0.0015   |
|              | 150      | 0.38 ± 0.024                 | 0.010 ± 0.000056             | 0.0018   |
|              | 750      | 0.029 ± 0.0014               | 0.0065 ± 0.00011             | 0.0020   |
|              | Average  | 0.63 ± 0.042                 | 0.011 ± 0.0092               | 0.0017   |
| <b>3.97</b>  | 7.5      | 1.35 ± 0.50                  | 0.31 ± 0.098                 | 0.0019   |
|              | 15       | 0.82 ± 0.15                  | 0.11 ± 0.15                  | 0.0025   |
|              | 75       | 0.81 ± 0.70                  | 0.0068 ± 0.00045             | 0.0023   |
|              | 150      | 0.67 ± 0.070                 | 0.0063 ± 0.00015             | 0.0023   |
|              | 750      | 0.022 ± 0.0030               | 0.0043 ± 0.000064            | 0.0018   |
|              | Average  | 0.73 ± 0.16                  | 0.086 ± 0.049                | 0.0022   |
| <b>4.95</b>  | 7.5      | 0.92 ± 0.032                 | 0.00037 ± 0.0023             | 0.0010   |
|              | 15       | 1.02 ± 0.053                 | 0.020 ± 0.0023               | 0.0015   |
|              | 37.5     | 0.79 ± 0.038                 | 0.011 ± 0.00029              | 0.0010   |
|              | 75       | 0.85 ± 0.10                  | 0.010 ± 0.000083             | 0.0015   |
|              | 150      | 0.34 ± 0.020                 | 0.0088 ± 0.000050            | 0.0020   |
|              | 375      | 0.022 ± 0.00065              | 0.0051 ± 0.000091            | 0.0020   |
|              | 1500     | 0.014 ± 0.00014              | 0.0033 ± 0.000028            | 0.0025   |
|              | Average  | 0.57 ± 0.035                 | 0.0085 ± 0.00074             | 0.0017   |
| <b>10.00</b> | 7.5      | 1.12 ± 0.13                  | 0.029 ± 0.011                | 0.0025   |

|              |                |                                    |                                      |               |
|--------------|----------------|------------------------------------|--------------------------------------|---------------|
|              | 15             | $0.76 \pm 0.052$                   | $0.033 \pm 0.0020$                   | 0.0025        |
|              | 75             | $0.21 \pm 0.012$                   | $0.021 \pm 0.00019$                  | 0.0035        |
|              | 150            | $0.069 \pm 0.0026$                 | $0.015 \pm 0.00019$                  | 0.0040        |
|              | 750            | $0.043 \pm 0.0012$                 | $0.011 \pm 0.000078$                 | 0.0030        |
|              | <b>Average</b> | <b><math>0.44 \pm 0.040</math></b> | <b><math>0.022 \pm 0.0026</math></b> | <b>0.0031</b> |
| <b>14.85</b> | 7.5            | $3.08 \pm 1.44$                    | $0.11 \pm 0.0030$                    | 0.0040        |
|              | 15             | $1.13 \pm 0.10$                    | $0.049 \pm 0.0011$                   | 0.0060        |
|              | 75             | $0.13 \pm 0.0055$                  | $0.031 \pm 0.00036$                  | 0.0030        |
|              | 150            | $0.11 \pm 0.0028$                  | $0.027 \pm 0.00021$                  | 0.0040        |
|              | 750            | $0.20 \pm 0.053$                   | $0.031 \pm 0.00039$                  | 0.010         |
|              | <b>Average</b> | <b><math>0.93 \pm 0.32</math></b>  | <b><math>0.050 \pm 0.0010</math></b> | <b>0.0054</b> |

**Table S2.** Summary of  $k_f$  values for 4.95 mM at 520 nm, for one step model (A  $\rightarrow$  B). As  $k_f$  values are inconsistent with each other, and correspond to poor residuals, a more complex (two-step) model is required for these data.

| <b>Time (s)</b> | <b><math>k_{f-1step} (s^{-1})</math></b> | <b>Residual</b>                                                      |
|-----------------|------------------------------------------|----------------------------------------------------------------------|
| <b>7.5</b>      | $0.26 \pm 0.0053$                        | 0.0015                                                               |
| <b>15</b>       | $0.065 \pm 0.0020$                       | -0.004 to 0.002, curved                                              |
| <b>37.5</b>     | $0.017 \pm 0.00042$                      | Starts -0.008, then sharp increase to 0.002, then stays flat         |
| <b>75</b>       | $0.011 \pm 0.000086$                     | Starts at -0.004, sharp increase to 0.0015, then flat                |
| <b>150</b>      | $0.0096 \pm 0.000071$                    | Starts at -0.015, sharp increase to 0.002, then flat/slightly curved |
| <b>375</b>      | $0.0074 \pm 0.000040$                    | Starts -0.02 to 0.005, then dip and back to 0.005                    |
| <b>1500</b>     | $0.0062 \pm 0.000055$                    | Sharp increase from -.05 to 0.02, then dip and return to 0.01        |

**Table S3.** Summary of  $k_f$  values for two concentrations for two-step model ( $A \rightarrow B \rightarrow C$ ) and the standard deviation for the residuals  $\sigma_r$ . For two Cu(I) concentrations, several timestamps were evaluated by stopped flow. The complete absorbance vs. time data were then imported into ReactLab KINETICS, in which the data evaluated under pseudo first-order kinetics with a global analysis. This was found to fit to a two-step model. See Table S4 for the corresponding data for a one step model. Please note, that the UV region is quite noisy in all measurements for sake of the 520 nm.

| [Cu(I)] (mM) | Time (s) | $k_{1-F}$ ( $s^{-1}$ ) | $k_{2-F}$ ( $s^{-1}$ ) | $\sigma_r$ |
|--------------|----------|------------------------|------------------------|------------|
| <b>0.9</b>   | 7.5      | $1.70 \pm 0.08$        | $0.24 \pm 0.02$        | 0.10       |
|              | 15       | $1.02 \pm 0.06$        | $0.075 \pm 0.03$       | 0.10       |
|              | 75       | $1.95 \pm 0.03$        | $0.0061 \pm 0.0002$    | 0.13       |
|              | 150      | $1.73 \pm 0.01$        | $0.00674 \pm 0.00009$  | 0.14       |
|              | 750      | $1.495 \pm 0.0004$     | $0.00660 \pm 0.00003$  | 0.17       |
| [Cu(I)] (mM) | Time (s) | $k_{1-F}$ ( $s^{-1}$ ) | $k_{2-F}$ ( $s^{-1}$ ) | $\sigma_r$ |
| <b>10</b>    | 7.5      | $1.6 \pm 0.1$          | $0.39 \pm 0.03$        | 0.25       |
|              | 15       | $1.34 \pm 0.01$        | $0.21 \pm 0.08$        | 0.26       |
|              | 75       | $0.93 \pm 0.03$        | $0.0296 \pm 0.0005$    | 0.27       |
|              | 150      | $1.20 \pm 0.04$        | $0.0217 \pm 0.0002$    | 0.26       |
|              | 750      | $1.41 \pm 0.01$        | $0.0134 \pm 0.0001$    | 0.27       |

**Table S4.** Summary of  $k_f$  values for two concentrations for global analysis and the standard deviation for the residuals  $\sigma_r$ , for one step model ( $A \rightarrow B$ ). As  $k_f$  values are inconsistent with each other, a more complex (two-step) model is required for these data.

| [Cu(I)] (mM) | Time (s) | $k_{1-F}$ ( $s^{-1}$ ) | $\sigma_r$ |
|--------------|----------|------------------------|------------|
| <b>0.9</b>   | 7.5      | $0.115 \pm 0.007$      | 0.10       |
|              | 15       | $0.114 \pm 0.003$      | 0.10       |
|              | 75       | $0.0070 \pm 0.0002$    | 0.13       |
|              | 150      | $0.00708 \pm 0.00009$  | 0.14       |
|              | 750      | $0.00668 \pm 0.00003$  | 0.17       |
| [Cu(I)] (mM) | Time (s) | $k_{1-F}$ ( $s^{-1}$ ) | $\sigma_r$ |
| <b>10</b>    | 7.5      | $0.21 \pm 0.01$        | 0.25       |
|              | 15       | $0.137 \pm 0.005$      | 0.26       |
|              | 75       | $0.0293 \pm 0.0005$    | 0.27       |
|              | 150      | $0.0225 \pm 0.0002$    | 0.26       |
|              | 750      | $0.0132 \pm 0.0001$    | 0.27       |



**Table S5.** Catalytic H<sub>2</sub>Q oxidation to BQ by **T**<sub>OC4F9</sub> in THF at -78°C.

| [Cu <sup>I</sup> ]<br>[mM] | Cu <sup>I</sup><br>[equiv] | Initial H <sub>2</sub> Q<br>[equiv] | Final H <sub>2</sub> Q<br>[equiv] | Final BQ<br>[equiv] | % Recovered<br>(H <sub>2</sub> Q + BQ) | TON  |
|----------------------------|----------------------------|-------------------------------------|-----------------------------------|---------------------|----------------------------------------|------|
| 5.00 <sup>[a]</sup>        | 1.00                       | 10.102                              | 4.10                              | 2.63                | 67.28%                                 | 7.90 |
| 5.00 <sup>[a]</sup>        | 1.00                       | 9.989                               | 4.18                              | 3.78                | 48.19%                                 | 7.20 |
| 5.00 <sup>[a]</sup>        | 1.00                       | 9.985                               | 1.30                              | 2.23                | 35.22%                                 | 6.65 |
| 5.00 <sup>[a]</sup>        | 1.00                       | 10.00                               | 2.19                              | 2.19                | 43.86%                                 | 6.59 |
| 5.00 <sup>[a]</sup>        | 1.00                       | 10.00                               | 2.37                              | 2.20                | 45.64%                                 | 6.59 |
| 5.00 <sup>[b]</sup>        | 1.00                       | 10.00                               | 1.74                              | 2.00                | 37.45%                                 | 5.99 |
| 5.00 <sup>[b]</sup>        | 1.00                       | 10.00                               | 1.44                              | 1.44                | 28.74%                                 | 4.31 |
| 5.00 <sup>[c]</sup>        | 1.00                       | 10.00                               | 2.69                              | 2.69                | 53.81%                                 | 8.07 |
| 5.00 <sup>[c]</sup>        | 1.00                       | 10.00                               | 2.16                              | 2.38                | 45.41%                                 | 7.14 |

[a] Catalytic reactions with **T**<sub>OC4F9</sub> catalyzing conversion of H<sub>2</sub>Q to BQ. Initial H<sub>2</sub>Q based on Cu(I), and final H<sub>2</sub>Q and BQ based on initial H<sub>2</sub>Q, determined by quantitative <sup>1</sup>H NMR. TON based on **T**<sub>OC4F9</sub>.

[b] Addition of sieves to catalytic reactions with **T**<sub>OC4F9</sub> catalyzing conversion of H<sub>2</sub>Q to BQ.

[c] Self-assembly reactions of **T**<sub>OC4F9</sub> with H<sub>2</sub>Q.

| Table S6. Product quantification in hydroxylation of phenolate (DBP) to catecholate (DBC) by $T_{OC4F9}$ in THF at $-78^{\circ}C$ |                                           |                            |                           |                         |                         |                                               |                                                                       |                                          |
|-----------------------------------------------------------------------------------------------------------------------------------|-------------------------------------------|----------------------------|---------------------------|-------------------------|-------------------------|-----------------------------------------------|-----------------------------------------------------------------------|------------------------------------------|
| Run                                                                                                                               | [Cu] <sup>I</sup><br>[mM]                 | Cu <sup>I</sup><br>[equiv] | Initial<br>DBP<br>[equiv] | Final<br>DBP<br>[equiv] | Final<br>DBC<br>[equiv] | Total %<br>Collected<br>(Phenol+<br>Catechol) | %Conversion<br>(based on 1<br>{Cu <sub>3</sub> O <sub>2</sub> } unit) | Product A or B,<br>Shifts (ppm)          |
| 1                                                                                                                                 | 5.00                                      | 1.00                       | 1.000                     | 0.83                    | 0.09                    | 90.0                                          | 27                                                                    | A (6.82, 6.73)                           |
| 2                                                                                                                                 | 5.00                                      | 1.00                       | 1.003                     | 0.60                    | 0.10                    | 70.0                                          | 30                                                                    | A (6.69, 6.79)                           |
| 3                                                                                                                                 | 5.00                                      | 1.00                       | 1.003                     | 0.63                    | 0.21                    | 84.0                                          | 63                                                                    | A (6.80, 6.69)                           |
| 4                                                                                                                                 | 5.00                                      | 1.00                       | 5.000                     | 3.70                    | 0.20                    | 78.0                                          | 60                                                                    | A (6.84, 6.75)                           |
| 5                                                                                                                                 | 5.00                                      | 1.00                       | 5.000                     | 3.50                    | 0.45                    | 79.0                                          | 135                                                                   | A (6.81, 7.72)                           |
| 6                                                                                                                                 | 5.00                                      | 1.00                       | 5.000                     | 2.75                    | 0.20                    | 59.0                                          | 60                                                                    | A (6.82, 6.74)                           |
| 7                                                                                                                                 | 5.00                                      | 1.00                       | 5.001                     | 2.85                    | 0.20                    | 61.0                                          | 60                                                                    | A (6.72, 6.84)                           |
| 8                                                                                                                                 | 5.00                                      | 1.00                       | 5.000                     | 2.85                    | 0.25                    | 62.0                                          | 75                                                                    | A (6.84, 6.76)                           |
| 9                                                                                                                                 | 5.00                                      | 1.00                       | 5.000                     | 2.10                    | 0.25                    | 47.0                                          | 75                                                                    | A (6.82, 6.74)                           |
| 10                                                                                                                                | 5.00                                      | 1.00                       | 4.998                     | 2.60                    | 0.35                    | 59.0                                          | 105                                                                   | A (6.84, 6.76)                           |
| 11                                                                                                                                | 5.00                                      | 1.00                       | 4.988                     | 2.40                    | 0.30                    | 54.0                                          | 90                                                                    | A (6.83, 6.74)                           |
| 12                                                                                                                                | 5.00                                      | 1.00                       | 4.983                     | 2.50                    | 0.55                    | 61.0                                          | 165                                                                   | A (6.82, 6.76)                           |
| 13                                                                                                                                | 5.00                                      | 1.00                       | 5.017                     | 2.31                    | 0.35                    | 53.0                                          | 105                                                                   | A (6.76, 6.61)                           |
| 14                                                                                                                                | 5.00                                      | 1.00                       | 5.046                     | 3.20                    | 0.30                    | 69.4                                          | 90                                                                    | A (6.76, 6.61)                           |
| 15                                                                                                                                | 5.00                                      | 1.00                       | 5.000                     | 3.74                    | 0.38                    | 82.4                                          | 114                                                                   | A (6.86, 6.79),<br>and B (6.98,<br>6.21) |
| 16                                                                                                                                | 5.00                                      | 1.00                       | 5.000                     | 3.62                    | 0.38                    | 80.0                                          | 114                                                                   | B (6.97, 6.21)                           |
| <sup>18</sup> O                                                                                                                   | 5.00                                      | 1.00                       | 5.000                     | 1.84                    | 0.14                    | 39.6                                          | 42                                                                    | A (6.86, 6.78)                           |
|                                                                                                                                   | Average (standard deviation) for 1 eq DBP |                            |                           | 0.69±<br>0.10           | 0.13±<br>0.05           | 82.00± 9.09                                   | 40.00± 16.31                                                          |                                          |
|                                                                                                                                   | Average (standard deviation) for 5 eq DBP |                            |                           | 2.93±<br>0.54           | 0.32±<br>0.10           | 64.98± 11.14                                  | 96.00± 30.30                                                          |                                          |
